# Supplementary material
Source: Springer Nature journal article supplement (https://www.springermedizin.de/resource/supplementary/12936_2011_1689_MOESM1_ESM.pdf/9541510)
Supplement: MOESM1 [file 9541510]

|     |                                |      |   |
|-----|--------------------------------|------|---|
| 256 | QGGGDNTSGGDNTHGGDNTHGGDNADKLQT | Type | 1 |
| 256 | QGGGDNTSGGDNTHG-----GDNADKLQT  | Type | 2 |
| 256 | QGGGDNT-----HGGDNADKLQT        | Type | 3 |
| 256 | QGGGDNT-----SGGDNADKLQT        | Type | 4 |
